# Supplementary material for: Immunological Responses and Epitope Mapping by Tuberculosis-Associated Antigens within the RD1 Region in Japanese Patients
Source: Hindawi journal article supplement (doi:10.1155/2014/764028), 2014-01-01
Supplement: f1 [file 764028.f1.pdf]

1 **Supplemental Table 1.** Peptide sequences of tuberculosis-specific antigens. CFP-10 is a  
 2 100 amino acid (a.a.) protein, ESAT-6 has 95 a.a., and TB7.7 has 81 a.a.

3 **ESAT-6**

```

MTEQQWNFAGIEAAASAIQGNVTSIHSLLEDEGKQSLTKLAAAWGGSGSEAYQGVQKWDATATELNALQNLARTISEAGQAMASTEGNVTGMFA
E1 1:15 MTEQQWNFAGIEAAA
E2 7:21   NFAGIEAAASAIQGN
E3 13:27  AAASAIQGNVTSIHS
E4 19:33   QGNVTSIHSLLEDEGK
E5 25:39   IHSLLDEGKQSLTKL
E6 31:45   EGKQSLTKLAAAWGG
E7 37:51   TKLAAAWGGSGSEAY
E8 43:57   WGGSGSEAYQGVQK
E9 49:63   EAYQGVQKWDATAT
E10 55:69  QKWDATATELNAL
E11 61:75  TATELNALQNLART
E12 67:81  NALQNLARTISEAGQ
E13 73:87  ARTISEAGQAMASTE
E14 79:93  AGQAMASTEGNVTGM
E15 85:95  STEGNVTGMFA
  
```

4

5

6 **CFP-10**

```

MAEMKTAATLAQEAGNFERISGDLKTQIDQVESTAGSLQGQWRGAAGTAAQAAVVRFQEAANKQKQELDEISTNIRQAGVQYSRADDEEQQALSSQMGF
C1 1:15 MAEMKTAATLAQEA
C2 7:21   DAATLAQEAGNFERI
C3 13:27  QEAGNFERISGDLKT
C4 19:33  ERISGDLKTQIDQVE
C5 25:39  LKTQIDQVESTAGSL
C6 31:45  QVESTAGSLQGQWRG
C7 37:51  GSLQGQWRGAAGTAA
C8 43:57  WRGAAGTAAQAAVVR
C9 49:63  TAAQAAVVRFQEAAN
C10 55:69 VVRFQEAANKQKQEL
C11 61:75 AANKQKQELDEISTN
C12 67:81 QELDEISTNIRQAGV
C13 73:87 STNIRQAGVQYSRAD
C14 79:93 AGVQYSRADDEEQQAA
C15 85:99 RADEEQQALSSQMGF
C16 91:100 QALSSQMGF
  
```

7

8

9 **TB7.7**

```

MSGHALAARTLLAAADELVGGPPVEASAAALAGDAAGAWRTAAVELARALVRAVAESHGVAAVLFAATAAAAAAIVDRGDPP
T1 1:15 MSGHALAARTLLAAA
T2 7:21   AARTLLAAADELVGG
T3 13:27  AAADLVGGPPVEAS
T4 19:33  VGGPPVEASAAALAG
T5 25:39  EASAAALAGDAAGAW
T6 31:45  LAGDAAGAWRTAAVE
T7 37:51  GAWRTAAVELARALV
T8 43:57  AVELARALVRAVAES
T9 49:63  ALVRAVAESHGVAAV
T10 55:69 AESHGVAAVLFAATA
T11 61:75 AAVLFAATAAAAAAV
T12 67:81 AAAAAAIVDRGDPP
T13 73:81 AAVDRGDPP
  
```

10
